# Supplementary material
Source: PubMed Central journal article supplement (PMC3393572)
Supplement: supp_86.12.6979_FigS1.pdf [file supp_86.12.6979_FigS1.pdf]

Supplementary Figure 1.

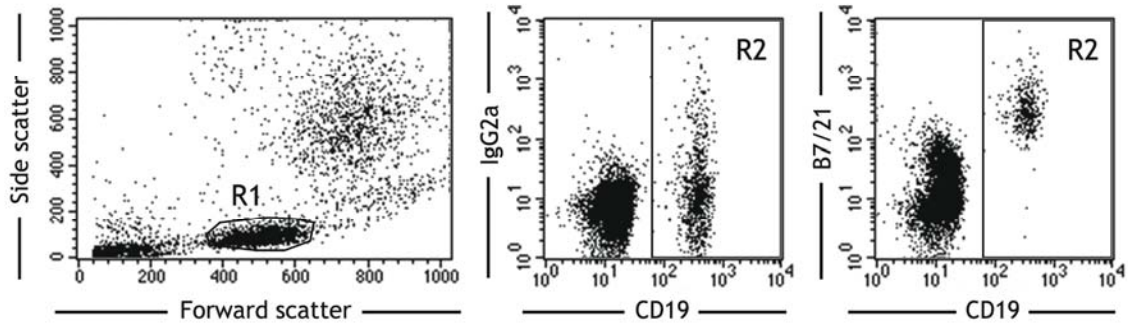

**Supplementary Figure 1. Detection of HLA-DP on the surface of peripheral blood CD19+ cells.** HLA-DP was detected by staining with the mAb B7/21 compared to an isotype control, after gating on lymphocyte scatter and CD19+ cells.
