# Supplementary material
Source: PubMed Central journal article supplement (PMC3393572)
Supplement: supp_86.12.6979_FigS2.pdf [file supp_86.12.6979_FigS2.pdf]

Supplementary Figure 2.

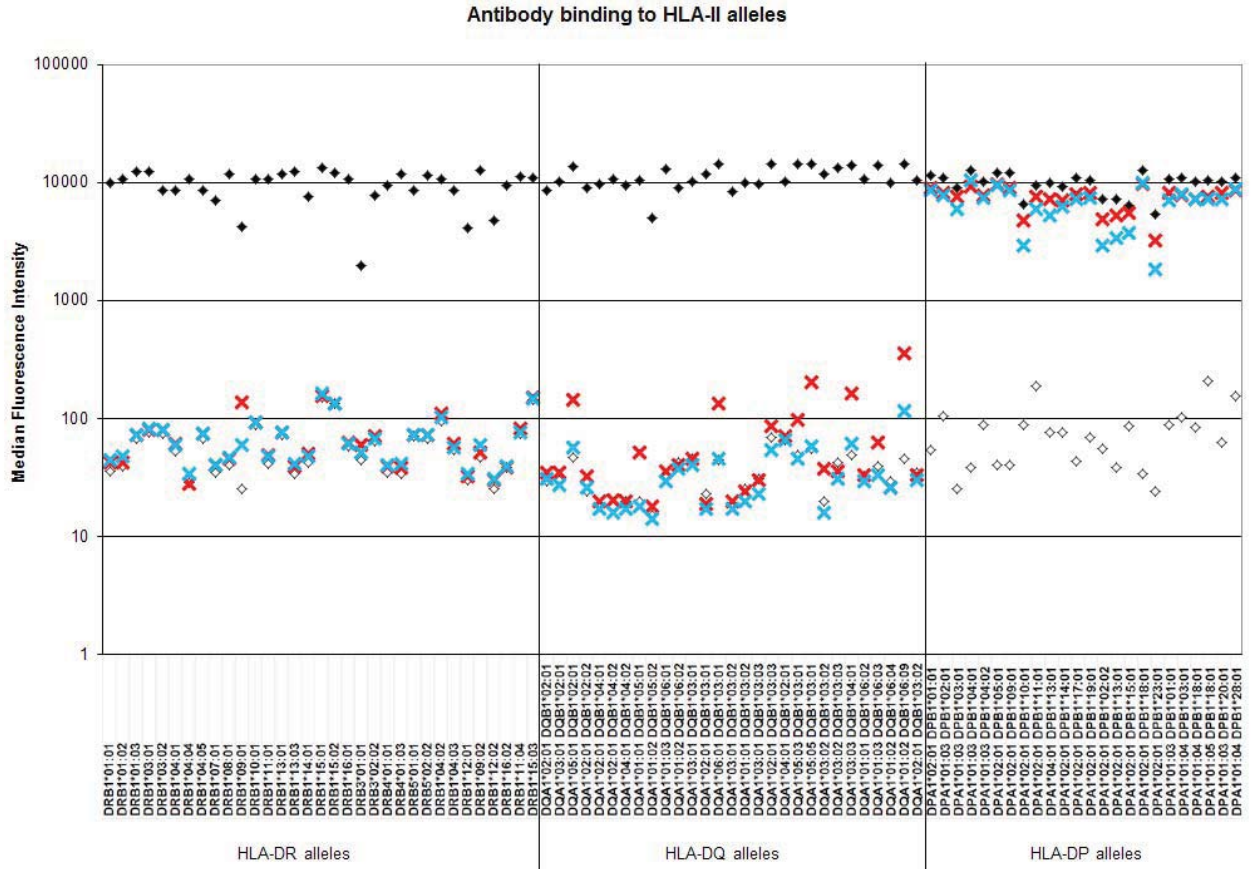

**Supplementary Figure 2. Characterization of monoclonal antibodies recognizing HLA-DP.** Antibodies used in this study were tested against 86 common HLA-DR, -DQ, and -DP class II allotypes. Median fluorescence intensity is shown for binding to each HLA class II allotype by an IgG2a negative control (white). mAbs B7/21 (red) and BrafB6 (blue) recognize all HLA-DP allotypes, but none of the HLA-DR/DQ molecules tested. A pool of mAbs Tu39 and SK10 (black) recognizes all HLA class II allotypes tested, serving as a positive control. These results are representative of at least three independent experiments.
