# Supplementary material
Source: PubMed Central journal article supplement (PMC3393572)
Supplement: supp_86.12.6979_FigS3.pdf [file supp_86.12.6979_FigS3.pdf]

Supplementary Figure 3.

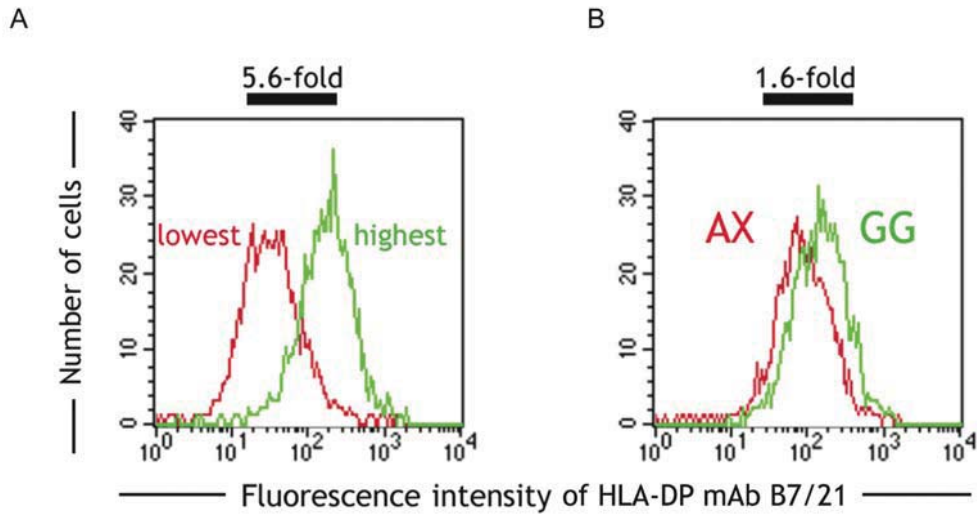

**Supplementary Figure 3. Variation in HLA-DP surface levels in European Americans.** Histograms are shown for the pair of donors with lowest and highest HLA-DP staining across the group of European Americans tested (A) and for a pair of donors having mean staining for the groups defined by the *496AA/AG* and *496GG* genotypes (B).
