# Supplementary material
Source: PubMed Central journal article supplement (PMC3393572)
Supplement: supp_86.12.6979_FigS4.pdf [file supp_86.12.6979_FigS4.pdf]

Supplementary Figure 4.

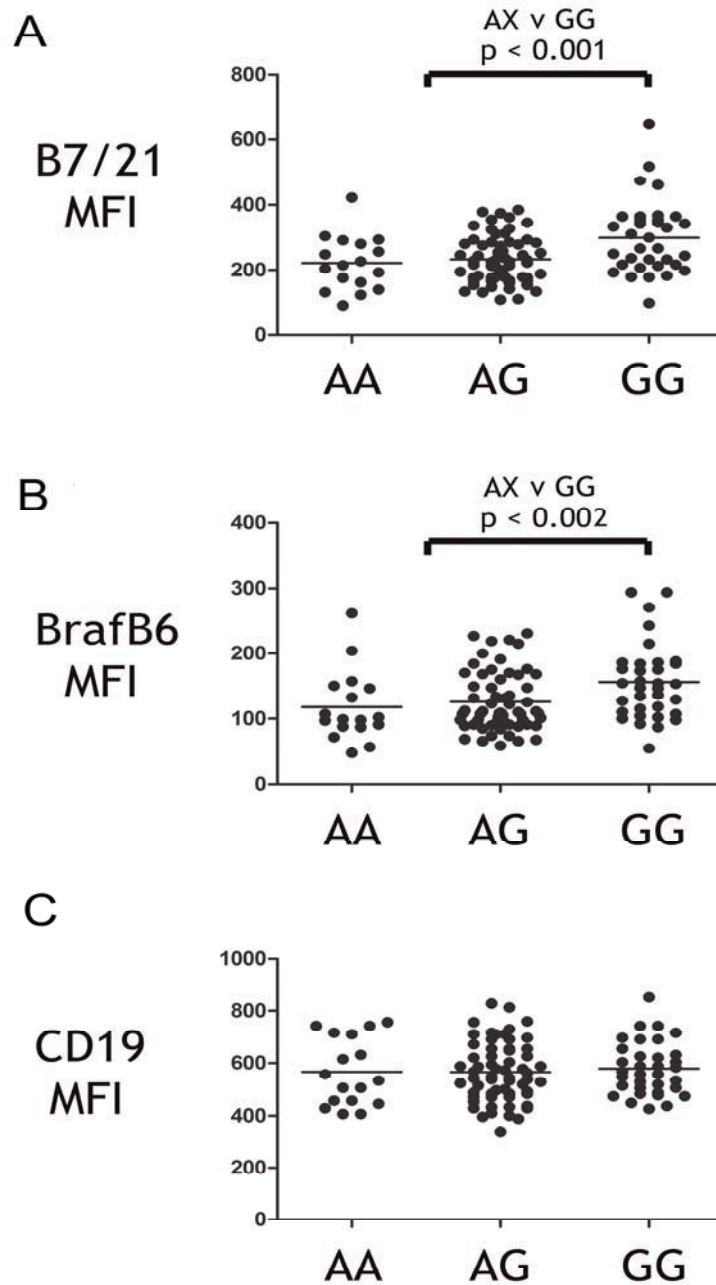

**Supplementary Figure 4. HLA-DP surface protein levels correlate with 496A/G *HLA-DPB1* SNP in normal African American donors.** HLA-DP molecules were detected on peripheral blood CD19+ from 112 normal African American donors. After gating on CD19+ lymphocytes, MFI of HLA-DP specific staining as detected by mAbs B7/21 (A) and BrafB6 (B) is shown for all 112 donors. MFI of CD19 staining on the same cells shows no correlation with the 496A/G variant genotypes (C). P values were generated using an unpaired Mann-Whitney t test.
