# Supplementary material
Source: PubMed Central journal article supplement (PMC3393572)
Supplement: supp_86.12.6979_FigS5.pdf [file supp_86.12.6979_FigS5.pdf]

**Supplementary Figure 5.**

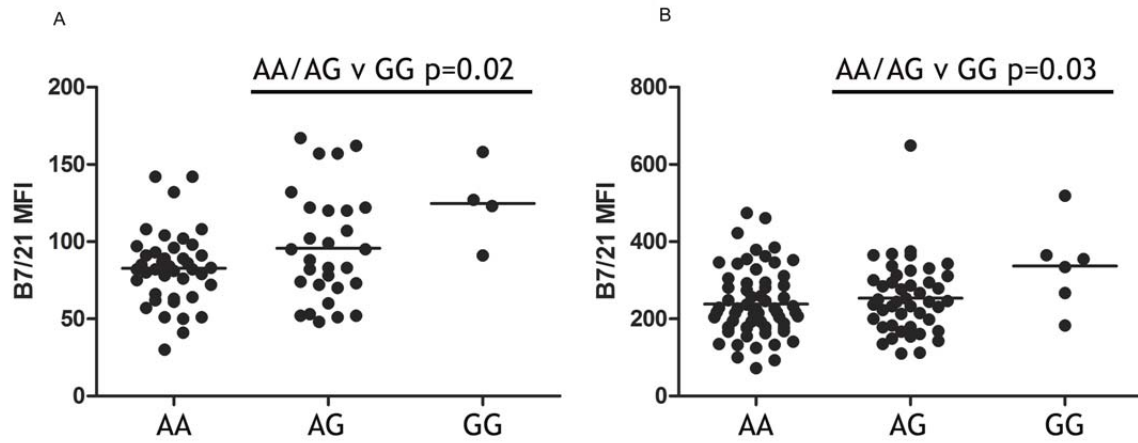

**Supplementary Figure 5. The *HLA-DPBI* 550A/G SNP that correlates with HBV clearance in the Asians associates only weakly with HLA-DP surface protein expression levels in European and African Americans.** Median fluorescence intensity of the HLA-DP staining with mAb B7/21 detected on peripheral blood CD19+ cells is shown for donors grouped by 550A/G genotypes in European American (A) and African American (B) donors. P values were generated using an unpaired Mann-Whitney t test.
