# Supplementary material
Source: PubMed Central journal article supplement (PMC3393572)
Supplement: supp_86.12.6979_FigS6.pdf [file supp_86.12.6979_FigS6.pdf]

Supplementary Figure 6.

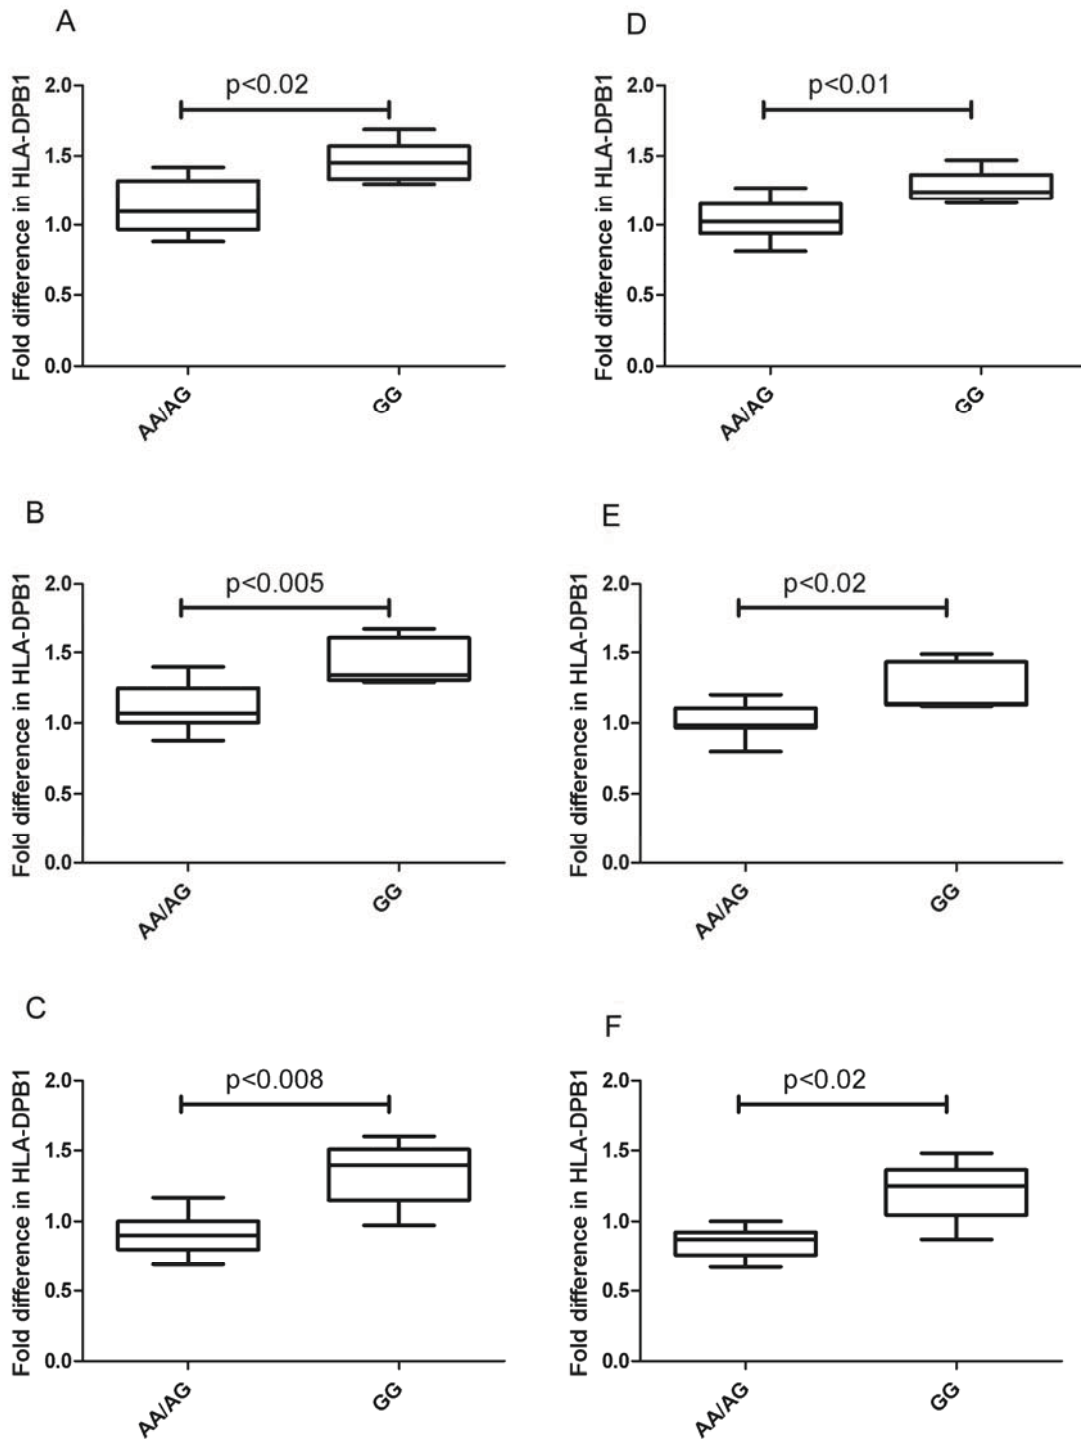

**Supplementary Figure 6. Fold differences in HLA-DPB1 mRNA transcript levels correlate with the 496A/G SNP using the relative quantification qPCR method.** HLA-DPB1 mRNA levels were determined in 15 normal European American donors by amplifying two different regions in the *HLA-DPB1* transcript. An *HLA-DPB1* amplicon

within exon 3 was measured relative to a calibrator with the following reference genes *RPLP0* (A), *ACTB* (B), and *GAPDH* (C). An *HLA-DPB1* amplicon spanning exons 1-2 was measured relative to a calibrator with reference genes *RPLP0* (D), *ACTB* (E), and *GAPDH* (F). HLA-DPB1 mRNA levels of 496AX (N=10) were significantly lower than that of 496GG (N=5) donors. P values were generated using an unpaired Mann-Whitney t test.
