# Supplementary material
Source: PubMed Central journal article supplement (PMC3393572)
Supplement: supp_86.12.6979_TableS1.pdf [file supp_86.12.6979_TableS1.pdf]

**Supplemental Table 1. Primer sequences for qPCR analysis**

| Gene            | Direction | Sequence               | Size (bp) | Reference                                                                                                                       |
|-----------------|-----------|------------------------|-----------|---------------------------------------------------------------------------------------------------------------------------------|
| <i>HLA-DPB1</i> | Forward   | GATGGTTCTGCAGGTTTCTGC  | 105       | Present study                                                                                                                   |
|                 | Reverse   | TAATTCTCTGGAGTGGACCTG  |           |                                                                                                                                 |
| <i>HLA-DPB1</i> | Forward   | GATTTCTACCCAGGCAGCATT  | 130       | Present study                                                                                                                   |
|                 | Reverse   | GGTCATTTCAGCATCACCAGGA |           |                                                                                                                                 |
| <i>RPLP0</i>    | Forward   | GCTTCCTGGAGGGTGTCC     | 105       | Dhanasekaran et al 2010 (1)                                                                                                     |
|                 | Reverse   | GGACTCGTTTGTACCCGTTG   |           |                                                                                                                                 |
| <i>GAPDH</i>    | Forward   | TTGCCATCAATGACCCCTTCA  | 174       | <a href="http://www.uic.edu/depts/rrc/cgf/realtime/primerseq.html">http://www.uic.edu/depts/rrc/cgf/realtime/primerseq.html</a> |
|                 | Reverse   | CGCCCCACTTGATTTTGGA    |           |                                                                                                                                 |
| <i>ACTB</i>     | Forward   | ATGGATGATGATATCGCCGC   | 151       | Romanowski et al. 2008 (2)                                                                                                      |
|                 | Reverse   | CCTTCTGACCCATGCCAC     |           |                                                                                                                                 |
