# Supplementary material
Source: PubMed Central journal article supplement (PMC3393572)
Supplement: supp_86.12.6979_TableS2.pdf [file supp_86.12.6979_TableS2.pdf]

**Supplemental Table 2. Association analysis of SNPs in the 3'UTR region of *HLA-DPBI* with HBV clearance**

|                      | dbSNP                    | Genotypes | Clearance<br>N | %     | Persistence<br>N | %     |                         | <i>P</i> value             | OR    | 95% CI    |           |
|----------------------|--------------------------|-----------|----------------|-------|------------------|-------|-------------------------|----------------------------|-------|-----------|-----------|
| All samples          | <i>rs933<sup>a</sup></i> | <i>CC</i> | 181            | 44.58 | 98               | 42.24 | <i>CC</i> vs. <i>TT</i> | 0.04                       | 0.46  | 0.22-0.97 |           |
|                      |                          | <i>CT</i> | 193            | 47.54 | 99               | 42.67 | <i>CC</i> vs. <i>CT</i> | 0.88                       | 0.97  | 0.68-1.40 |           |
|                      |                          | <i>TT</i> | 32             | 7.88  | 35               | 15.09 | <i>CT</i> vs. <i>TT</i> | 0.01                       | 0.36  | 0.17-0.74 |           |
|                      |                          |           |                |       |                  |       |                         | <i>CC</i> vs. <i>CT/TT</i> | 0.45  | 0.88      | 0.63-1.23 |
|                      |                          |           |                |       |                  |       |                         | <i>CT/CC</i> vs. <i>TT</i> | 0.002 | 0.41      | 0.24-0.71 |
| European<br>American |                          | <i>CC</i> | 156            | 50.16 | 83               | 46.11 | <i>CC</i> vs. <i>TT</i> | 0.13                       | 0.48  | 0.18-1.25 |           |
|                      |                          | <i>CT</i> | 144            | 46.30 | 80               | 44.44 | <i>CC</i> vs. <i>CT</i> | 0.61                       | 0.90  | 0.61-1.34 |           |
|                      |                          | <i>TT</i> | 11             | 3.54  | 17               | 9.44  | <i>CT</i> vs. <i>TT</i> | 0.01                       | 0.15  | 0.03-0.67 |           |
|                      |                          |           |                |       |                  |       |                         | <i>CC</i> vs. <i>CT/TT</i> | 0.40  | 0.85      | 0.59-1.23 |
|                      |                          |           |                |       |                  |       |                         | <i>CT/CC</i> vs. <i>TT</i> | 0.01  | 0.33      | 0.14-0.74 |
| African<br>American  |                          | <i>CC</i> | 20             | 25.00 | 9                | 20.93 | <i>CC</i> vs. <i>TT</i> | 0.09                       | 0.32  | 0.09-1.21 |           |
|                      |                          | <i>CT</i> | 42             | 52.50 | 16               | 37.21 | <i>CC</i> vs. <i>CT</i> | 0.93                       | 1.05  | 0.36-3.08 |           |
|                      |                          | <i>TT</i> | 18             | 22.50 | 18               | 41.86 | <i>CT</i> vs. <i>TT</i> | 0.07                       | 0.42  | 0.17-1.08 |           |
|                      |                          |           |                |       |                  |       |                         | <i>CC</i> vs. <i>CT/TT</i> | 0.49  | 0.74      | 0.31-1.74 |
|                      |                          |           |                |       |                  |       |                         | <i>CT/CC</i> vs. <i>TT</i> | 0.02  | 0.39      | 0.17-0.88 |
| All samples          | <i>rs9277522</i>         | <i>GG</i> | 180            | 44.33 | 97               | 41.81 | <i>GG</i> vs. <i>AA</i> | 0.03                       | 0.42  | 0.19-0.92 |           |
|                      |                          | <i>AG</i> | 194            | 47.78 | 99               | 42.67 | <i>GG</i> vs. <i>AG</i> | 0.88                       | 0.97  | 0.68-1.40 |           |
|                      |                          | <i>AA</i> | 32             | 7.88  | 36               | 15.52 | <i>AG</i> vs. <i>AA</i> | 0.005                      | 0.35  | 0.17-0.73 |           |
|                      |                          |           |                |       |                  |       |                         | <i>GG</i> vs. <i>AA/AG</i> | 0.41  | 0.87      | 0.62-1.21 |
|                      |                          |           |                |       |                  |       |                         | <i>AG/GG</i> vs. <i>AA</i> | 0.001 | 0.39      | 0.22-0.68 |
| European<br>American |                          | <i>GG</i> | 156            | 50.16 | 83               | 46.11 | <i>GG</i> vs. <i>AA</i> | 0.13                       | 0.48  | 0.18-1.25 |           |

|                   |                              |           |     |       |     |       |                     |      |      |           |
|-------------------|------------------------------|-----------|-----|-------|-----|-------|---------------------|------|------|-----------|
|                   |                              | <i>AG</i> | 144 | 46.30 | 80  | 44.44 | <i>GG vs. AG</i>    | 0.61 | 0.90 | 0.61-1.34 |
|                   |                              | <i>AA</i> | 11  | 3.54  | 17  | 9.44  | <i>AG vs. AA</i>    | 0.01 | 0.15 | 0.03-0.67 |
|                   |                              |           |     |       |     |       | <i>GG vs. AA/AG</i> | 0.40 | 0.85 | 0.59-1.23 |
|                   |                              |           |     |       |     |       | <i>AG/GG vs. AA</i> | 0.01 | 0.33 | 0.14-0.74 |
| African American  |                              | <i>GG</i> | 19  | 23.75 | 8   | 18.60 | <i>GG vs. AA</i>    | 0.06 | 0.22 | 0.05-1.07 |
|                   |                              | <i>AG</i> | 43  | 53.75 | 16  | 37.21 | <i>GG vs. AG</i>    | 0.93 | 1.05 | 0.36-3.08 |
|                   |                              | <i>AA</i> | 18  | 22.50 | 19  | 44.19 | <i>AG vs. AA</i>    | 0.07 | 0.42 | 0.17-1.06 |
|                   |                              |           |     |       |     |       | <i>GG vs. AA/AG</i> | 0.38 | 0.67 | 0.27-1.66 |
|                   |                              |           |     |       |     |       | <i>AG/GG vs. AA</i> | 0.01 | 0.34 | 0.15-0.79 |
| All samples       | <i>rs1042634<sup>b</sup></i> | <i>TT</i> | 346 | 85.22 | 186 | 80.17 | <i>TT vs. CC</i>    | 0.44 | 0.65 | 0.21-1.98 |
|                   |                              | <i>CT</i> | 47  | 11.58 | 38  | 16.38 | <i>TT vs. CT</i>    | 0.05 | 0.58 | 0.34-0.99 |
|                   |                              | <i>CC</i> | 13  | 3.20  | 8   | 3.45  | <i>CT vs. CC</i>    | 0.81 | 1.20 | 0.28-5.11 |
|                   |                              |           |     |       |     |       | <i>TT vs. CT/CC</i> | 0.04 | 0.60 | 0.37-0.97 |
|                   |                              |           |     |       |     |       | <i>CT/TT vs. CC</i> | 0.69 | 0.83 | 0.32-2.10 |
| European American |                              | <i>TT</i> | 287 | 92.28 | 159 | 88.33 | <i>TT vs. CC</i>    |      |      |           |
|                   |                              | <i>CT</i> | 24  | 7.72  | 20  | 11.11 | <i>TT vs. CT</i>    | 0.22 | 0.67 | 0.35-1.28 |
|                   |                              | <i>CC</i> | 0   | 0.00  | 1   | 0.56  | <i>CT vs. CC</i>    |      |      |           |
|                   |                              |           |     |       |     |       | <i>TT vs. CT/CC</i> | 0.16 | 0.63 | 0.33-1.19 |
|                   |                              |           |     |       |     |       | <i>CT/TT vs. CC</i> |      |      |           |
| African American  |                              | <i>TT</i> | 46  | 57.50 | 18  | 41.86 | <i>TT vs. CC</i>    | 0.53 | 0.68 | 0.20-2.31 |
|                   |                              | <i>CT</i> | 22  | 27.50 | 18  | 41.86 | <i>TT vs. CT</i>    | 0.06 | 0.38 | 0.14-1.04 |
|                   |                              | <i>CC</i> | 12  | 15.00 | 7   | 16.28 | <i>CT vs. CC</i>    | 0.81 | 1.20 | 0.28-5.11 |
|                   |                              |           |     |       |     |       | <i>TT vs. CT/CC</i> | 0.07 | 0.48 | 0.21-1.05 |
|                   |                              |           |     |       |     |       | <i>CT/TT vs. CC</i> | 0.80 | 0.88 | 0.33-2.37 |
| All samples       | <i>rs34087328</i>            | <i>TT</i> | 401 | 98.77 | 230 | 99.14 | <i>TT vs. GT</i>    | 0.77 | 1.29 | 0.22-7.51 |

|                   |                              |           |     |        |     |        |                     |       |      |           |
|-------------------|------------------------------|-----------|-----|--------|-----|--------|---------------------|-------|------|-----------|
|                   |                              | <i>GT</i> | 5   | 1.23   | 2   | 0.86   |                     |       |      |           |
| European American |                              | <i>TT</i> | 311 | 100.00 | 180 | 100.00 |                     |       |      |           |
| African American  |                              | <i>TT</i> | 76  | 95.00  | 41  | 95.35  | <i>TT vs. GT</i>    | 1.00  | 1.00 | 0.16-6.42 |
|                   |                              | <i>GT</i> | 4   | 5.00   | 2   | 4.65   |                     |       |      |           |
| All samples       | <i>rs35277091</i>            | <i>II</i> | 367 | 90.39  | 203 | 87.50  | <i>II vs. DD</i>    | 0.26  | 0.25 | 0.02-2.76 |
|                   |                              | <i>DI</i> | 38  | 9.36   | 27  | 11.64  | <i>II vs. DI</i>    | 0.38  | 0.79 | 0.47-1.34 |
|                   |                              | <i>DD</i> | 1   | 0.25   | 2   | 0.86   | <i>DI vs. DD</i>    | 0.31  | 0.76 | 0.45-1.21 |
|                   |                              |           |     |        |     |        | <i>II vs. DD/DI</i> | 0.26  | 0.75 | 0.45-1.25 |
|                   |                              |           |     |        |     |        | <i>DI/II vs. DD</i> | 0.26  | 0.25 | 0.02-2.76 |
| European American |                              | <i>II</i> | 291 | 93.57  | 158 | 87.78  | <i>II vs. DD</i>    |       |      |           |
|                   |                              | <i>DI</i> | 20  | 6.43   | 21  | 11.67  | <i>II vs. DI</i>    | 0.04  | 0.49 | 0.25-0.97 |
|                   |                              | <i>DD</i> | 0   | 0.00   | 1   | 0.56   | <i>DI vs. DD</i>    |       |      |           |
|                   |                              |           |     |        |     |        | <i>II vs. DD/DI</i> | 0.02  | 0.47 | 0.24-0.91 |
|                   |                              |           |     |        |     |        | <i>DI/II vs. DD</i> |       |      |           |
| African American  |                              | <i>II</i> | 64  | 80.00  | 36  | 83.72  | <i>II vs. DD</i>    | 0.62  | 0.50 | 0.03-7.99 |
|                   |                              | <i>DI</i> | 15  | 18.75  | 6   | 13.95  | <i>II vs. DI</i>    | 0.47  | 1.44 | 0.53-3.89 |
|                   |                              | <i>DD</i> | 1   | 1.25   | 1   | 2.33   | <i>DI vs. DD</i>    | 0.49  | 1.44 | 0.51-4.07 |
|                   |                              |           |     |        |     |        | <i>II vs. DD/DI</i> | 0.59  | 1.29 | 0.51-3.27 |
|                   |                              |           |     |        |     |        | <i>DI/II vs. DD</i> | 0.62  | 0.50 | 0.03-7.99 |
| All samples       | <i>rs9277529<sup>c</sup></i> | <i>CC</i> | 182 | 44.83  | 98  | 42.24  | <i>CC vs. GG</i>    | 0.01  | 0.41 | 0.21-0.84 |
|                   |                              | <i>CG</i> | 184 | 45.32  | 90  | 38.79  | <i>CC vs. CG</i>    | 0.97  | 1.01 | 0.69-1.46 |
|                   |                              | <i>GG</i> | 40  | 9.85   | 44  | 18.97  | <i>CG vs. GG</i>    | 0.003 | 0.36 | 0.18-0.71 |
|                   |                              |           |     |        |     |        | <i>CC vs. CG/GG</i> | 0.42  | 0.87 | 0.63-1.21 |

|                          |           |     |       |     |       |                     |        |      |           |
|--------------------------|-----------|-----|-------|-----|-------|---------------------|--------|------|-----------|
|                          |           |     |       |     |       | <i>CC/CG vs. GG</i> | 0.0004 | 0.39 | 0.23-0.66 |
| European American        | <i>CC</i> | 157 | 50.48 | 83  | 46.11 | <i>CC vs. GG</i>    | 0.04   | 0.37 | 0.15-0.94 |
|                          | <i>CG</i> | 141 | 45.34 | 75  | 41.67 | <i>CC vs. CG</i>    | 0.73   | 0.93 | 0.63-1.39 |
|                          | <i>GG</i> | 13  | 4.18  | 22  | 12.22 | <i>CG vs. GG</i>    | 0.01   | 0.19 | 0.05-0.67 |
|                          |           |     |       |     |       | <i>CC vs. CG/GG</i> | 0.37   | 0.85 | 0.59-1.22 |
|                          |           |     |       |     |       | <i>CC/CG vs. GG</i> | 0.002  | 0.29 | 0.14-0.63 |
| African American         | <i>CC</i> | 20  | 25.00 | 9   | 20.93 | <i>CC vs. GG</i>    | 0.11   | 0.38 | 0.12-1.23 |
|                          | <i>CG</i> | 36  | 45.00 | 12  | 27.91 | <i>CC vs. CG</i>    | 0.84   | 1.14 | 0.34-3.78 |
|                          | <i>GG</i> | 24  | 30.00 | 22  | 51.16 | <i>CG vs. GG</i>    | 0.06   | 0.42 | 0.17-1.05 |
|                          |           |     |       |     |       | <i>CC vs. CG/GG</i> | 0.49   | 0.74 | 0.31-1.74 |
|                          |           |     |       |     |       | <i>CC/CG vs. GG</i> | 0.02   | 0.41 | 0.19-0.88 |
| All samples <i>rs934</i> | <i>AA</i> | 213 | 52.46 | 117 | 50.43 | <i>AA vs. GG</i>    | 0.04   | 0.49 | 0.24-0.98 |
|                          | <i>AG</i> | 162 | 39.90 | 82  | 35.34 | <i>AA vs. AG</i>    | 0.97   | 1.01 | 0.69-1.46 |
|                          | <i>GG</i> | 31  | 7.64  | 33  | 14.22 | <i>AG vs. GG</i>    | 0.01   | 0.34 | 0.15-0.75 |
|                          |           |     |       |     |       | <i>AA vs. AG/GG</i> | 0.52   | 0.90 | 0.64-1.25 |
|                          |           |     |       |     |       | <i>AA/AG vs. GG</i> | 0.003  | 0.44 | 0.25-0.76 |
| European American        | <i>AA</i> | 175 | 56.27 | 99  | 55.00 | <i>AA vs. GG</i>    | 0.13   | 0.48 | 0.18-1.25 |
|                          | <i>AG</i> | 125 | 40.19 | 65  | 36.11 | <i>AA vs. AG</i>    | 0.81   | 1.05 | 0.70-1.58 |
|                          | <i>GG</i> | 11  | 3.54  | 16  | 8.89  | <i>AG vs. GG</i>    | 0.02   | 0.17 | 0.04-0.79 |
|                          |           |     |       |     |       | <i>AA vs. AG/GG</i> | 0.87   | 0.97 | 0.67-1.41 |
|                          |           |     |       |     |       | <i>AA/AG vs. GG</i> | 0.01   | 0.35 | 0.15-0.80 |
| African American         | <i>AA</i> | 30  | 37.50 | 12  | 27.91 | <i>AA vs. GG</i>    | 0.11   | 0.42 | 0.14-1.21 |
|                          | <i>AG</i> | 33  | 41.25 | 14  | 32.56 | <i>AA vs. AG</i>    | 0.53   | 0.71 | 0.24-2.08 |
|                          | <i>GG</i> | 17  | 21.25 | 17  | 39.53 | <i>AG vs. GG</i>    | 0.06   | 0.36 | 0.12-1.04 |

|                      |                                          |           |     |       |     |       |                     |                     |      |           |
|----------------------|------------------------------------------|-----------|-----|-------|-----|-------|---------------------|---------------------|------|-----------|
|                      |                                          |           |     |       |     |       | <i>AA vs. AG/GG</i> | 0.21                | 0.61 | 0.28-1.33 |
|                      |                                          |           |     |       |     |       | <i>AA/AG vs. GG</i> | 0.03                | 0.41 | 0.18-0.92 |
| All samples          | <i>rs9277534<sup>d</sup></i><br>(496A/G) | <i>AA</i> | 182 | 44.83 | 98  | 42.24 | <i>AA vs. GG</i>    | 0.01                | 0.39 | 0.19-0.79 |
|                      |                                          | <i>AG</i> | 184 | 45.32 | 88  | 37.93 | <i>AA vs. AG</i>    | 0.87                | 1.03 | 0.71-1.50 |
|                      |                                          | <i>GG</i> | 40  | 9.85  | 46  | 19.83 | <i>AG vs. GG</i>    | 0.002               | 0.34 | 0.17-0.68 |
|                      |                                          |           |     |       |     |       |                     | <i>AA vs. AG/GG</i> | 0.42 | 0.87      |
|                      |                                          |           |     |       |     |       | <i>AA/AG vs. GG</i> | 0.0001              | 0.37 | 0.22-0.62 |
| European<br>American |                                          | <i>AA</i> | 157 | 50.48 | 83  | 46.11 | <i>AA vs. GG</i>    | 0.02                | 0.34 | 0.14-0.85 |
|                      |                                          | <i>AG</i> | 141 | 45.34 | 73  | 40.56 | <i>AA vs. AG</i>    | 0.84                | 0.96 | 0.64-1.43 |
|                      |                                          | <i>GG</i> | 13  | 4.18  | 24  | 13.33 | <i>AG vs. GG</i>    | 0.01                | 0.17 | 0.05-0.60 |
|                      |                                          |           |     |       |     |       | <i>AA vs. AG/GG</i> | 0.37                | 0.85 | 0.59-1.22 |
|                      |                                          |           |     |       |     |       | <i>AA/AG vs. GG</i> | 0.0005              | 0.26 | 0.12-0.56 |
| African<br>American  |                                          | <i>AA</i> | 20  | 25.00 | 9   | 20.93 | <i>AA vs. GG</i>    | 0.11                | 0.38 | 0.12-1.23 |
|                      |                                          | <i>AG</i> | 36  | 45.00 | 12  | 27.91 | <i>AA vs. AG</i>    | 0.84                | 1.14 | 0.34-3.78 |
|                      |                                          | <i>GG</i> | 24  | 30.00 | 22  | 51.16 | <i>AG vs. GG</i>    | 0.06                | 0.42 | 0.17-1.05 |
|                      |                                          |           |     |       |     |       | <i>AA vs. AG/GG</i> | 0.49                | 0.74 | 0.31-1.74 |
|                      |                                          |           |     |       |     |       | <i>AA/AG vs. GG</i> | 0.02                | 0.41 | 0.19-0.88 |
| All samples          | <i>rs9277535</i><br>(550A/G)             | <i>AA</i> | 233 | 57.39 | 130 | 56.03 | <i>AA vs. GG</i>    | 0.11                | 0.51 | 0.23-1.16 |
|                      |                                          | <i>AG</i> | 159 | 39.16 | 84  | 36.21 | <i>AA vs. AG</i>    | 0.75                | 1.06 | 0.75-1.49 |
|                      |                                          | <i>GG</i> | 14  | 3.45  | 18  | 7.76  | <i>AG vs. GG</i>    | 0.05                | 0.12 | 0.01-1.02 |
|                      |                                          |           |     |       |     |       |                     | <i>AA vs. AG/GG</i> | 0.75 | 0.95      |
|                      |                                          |           |     |       |     |       | <i>AA/AG vs. GG</i> | 0.01                | 0.39 | 0.19-0.83 |
| European<br>American |                                          | <i>AA</i> | 177 | 56.91 | 99  | 55.00 | <i>AA vs. GG</i>    | 0.10                | 0.44 | 0.17-1.18 |
|                      |                                          | <i>AG</i> | 125 | 40.19 | 66  | 36.67 | <i>AA vs. AG</i>    | 0.82                | 1.04 | 0.71-1.53 |
|                      |                                          | <i>GG</i> | 9   | 2.89  | 15  | 8.33  | <i>AG vs. GG</i>    | 0.01                | 0.31 | 0.13-0.75 |

|          |           |    |       |    |       |                     |      |      |           |
|----------|-----------|----|-------|----|-------|---------------------|------|------|-----------|
|          |           |    |       |    |       | <i>AA vs. AG/GG</i> | 0.72 | 0.94 | 0.66-1.34 |
|          |           |    |       |    |       | <i>AA/AG vs. GG</i> | 0.01 | 0.29 | 0.11-0.72 |
| African  |           |    |       |    |       |                     |      |      |           |
| American | <i>AA</i> | 49 | 61.25 | 25 | 58.14 | <i>AA vs. GG</i>    | 0.40 | 0.50 | 0.10-2.48 |
|          | <i>AG</i> | 28 | 35.00 | 15 | 34.88 | <i>AA vs. AG</i>    | 1.00 | 1.00 | 0.41-2.45 |
|          | <i>GG</i> | 3  | 3.75  | 3  | 6.98  | <i>AG vs. GG</i>    | 0.25 | 0.32 | 0.05-2.19 |
|          |           |    |       |    |       | <i>AA vs. AG/GG</i> | 0.69 | 0.85 | 0.39-1.87 |
|          |           |    |       |    |       | <i>AA/AG vs. GG</i> | 0.40 | 0.50 | 0.10-2.48 |

---

SNPs in complete LD with other SNPs listed above in the 3'UTR region

<sup>a</sup> *rs1126719, rs1126723, rs1042448, rs9277523, rs1042467, rs1042488, rs1042497, rs1042502, rs1042508, rs1042511, rs1042516, rs1042544, rs931, rs928, rs935, rs932*

<sup>b</sup> *rs6760*

<sup>c</sup> *rs929, rs930, rs9277532*

<sup>d</sup> *rs9277530, rs9277531, rs9277533, rs9277536*
