# Supplementary material
Source: PubMed Central journal article supplement (PMC3393572)
Supplement: supp_86.12.6979_TableS3.pdf [file supp_86.12.6979_TableS3.pdf]

**Supplemental Table 3. Linkage disequilibrium between *HLA-DPB1* alleles and 496A/G and *HLA-DPB1* alleles and 550A/G in the European American population with a haplotype frequency of >1%**

| <i>HLA-DPB1</i> | 496A/G | Frequency | D <sup>a</sup> | P               | <i>HLA-DPB1</i> | 550A/G | Frequency | D'  | P       |
|-----------------|--------|-----------|----------------|-----------------|-----------------|--------|-----------|-----|---------|
| *01:01          | G      | 0.045     | 1.0            | <0.0001         | *01:01          | A      | 0.045     | 1.0 | <0.0001 |
| *03:01          | G      | 0.099     | 1.0            | <0.0001         | *03:01          | G      | 0.099     | 1.0 | <0.0001 |
| *05:01          | G      | 0.020     | 1.0            | <0.0001         | *05:01          | G      | 0.020     | 1.0 | <0.0001 |
| *06:01          | G      | 0.020     | 0.9            | <0.0001         | *06:01          | G      | 0.020     | 0.9 | <0.0001 |
| *10:01          | G      | 0.017     | 1.0            | <0.0001         | *10:01          | G      | 0.017     | 1.0 | <0.0001 |
| *11:01          | G      | 0.023     | 1.0            | <0.0001         | *11:01          | G      | 0.023     | 1.0 | <0.0001 |
| *13:01          | G      | 0.026     | 1.0            | <0.0001         | *13:01          | G      | 0.026     | 1.0 | <0.0001 |
| *14:01          | G      | 0.019     | 1.0            | <0.0001         | *14:01          | G      | 0.019     | 1.0 | <0.0001 |
| *02:01          | A      | 0.135     | 1.0            | <0.0001         | *02:01          | A      | 0.135     | 1.0 | <0.0001 |
| *04:01          | A      | 0.411     | 1.0            | <0.0001         | *04:01          | A      | 0.411     | 1.0 | <0.0001 |
| *04:02          | A      | 0.122     | 1.0            | <0.0001         | *04:02          | A      | 0.122     | 1.0 | <0.0001 |
| *17:01          | A      | 0.014     | 1.0            | NS <sup>b</sup> | *17:01          | A      | 0.014     | 1.0 | NS      |

<sup>a</sup>D' linkage disequilibrium

<sup>b</sup>NS- not significant

N=662
