# Supplementary material
Source: PubMed Central journal article supplement (PMC3393572)
Supplement: supp_86.12.6979_TableS4.pdf [file supp_86.12.6979_TableS4.pdf]

**Supplemental Table 4. Linkage disequilibrium between *HLA-DPB1* alleles and *496A/G* and *HLA-DPB1* alleles and *550A/G* in the African American population with a haplotype frequency of >1%**

| <i>HLA-DPB1</i> | <i>496A/G</i> | Frequency | D' <sup>a</sup> | P               | <i>HLA-DPB1</i> | <i>550A/G</i> | Frequency | D'  | P       |
|-----------------|---------------|-----------|-----------------|-----------------|-----------------|---------------|-----------|-----|---------|
| *01:01          | G             | 0.313     | 1.0             | <0.0001         | *01:01          | A             | 0.313     | 1.0 | <0.0001 |
| *03:01          | G             | 0.056     | 1.0             | 0.004           | *03:01          | G             | 0.056     | 1.0 | <0.0001 |
| *11:01          | G             | 0.052     | 1.0             | 0.005           | *11:01          | G             | 0.049     | 1.0 | <0.0001 |
| *13:01          | G             | 0.032     | 1.0             | 0.03            | *13:01          | G             | 0.032     | 1.0 | <0.0001 |
| *18:01          | G             | 0.054     | 1.0             | 0.004           | *18:01          | G             | 0.054     | 1.0 | <0.0001 |
| *02:01          | A             | 0.130     | 1.0             | <0.0001         | *02:01          | A             | 0.128     | 1.0 | 0.02    |
| *04:01          | A             | 0.103     | 1.0             | <0.0001         | *04:01          | A             | 0.101     | 1.0 | 0.04    |
| *04:02          | A             | 0.127     | 0.9             | <0.0001         | *04:02          | A             | 0.126     | 0.9 | NS      |
| *17:01          | A             | 0.029     | 0.1             | NS <sup>b</sup> | *17:01          | A             | 0.046     | 0.1 | NS      |
| *40:01          | A             | 0.012     | 1.0             | 0.04            | *40:01          | A             | 0.013     | 1.0 | NS      |

<sup>a</sup>D' linkage disequilibrium

<sup>b</sup>NS- not significant

N=300

#### References

1. **Dhanasekaran, S., T. M. Doherty, and J. Kenneth.** 2010. Comparison of different standards for real-time PCR-based absolute quantification. *J Immunol Methods* **354**:34-39.
2. **Romanowski, T., K. Sikorska, and K. P. Bielawski.** 2008. GUS and PMM1 as suitable reference genes for gene expression analysis in the liver tissue of patients with chronic hepatitis. *Med Sci Monit* **14**:BR147-152.
